# Supplementary material
Source: Springer Nature journal article supplement (https://www.springermedizin.de/resource/supplementary/13045_2013_327_MOESM7_ESM.pdf/9661132)
Supplement: MOESM7 [file 9661132]

**Table 3 Selected Compounds proposed as epigenetic tools for leukemia treatment according to the International Database for Patents of Inventions.**

| Patent document | Compound                                                                            | Proposed Function |
|-----------------|-------------------------------------------------------------------------------------|-------------------|
| WO2011143660    | 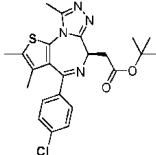   | BDR4 inhibitor    |
| WO2010009285    |    | HDAC inhibitor    |
| US20080138329   |    | DNMT inhibitor    |
| US2010305059    |  | antiproliferative |
| US2006106049    |  | HDAC inhibitor    |
| ES2399670       |  | HDAC inhibitor    |
